# Supplementary material
Source: PubMed Central journal article supplement (PMC7500575)

Supplementary Figure 1. Bivariate correlation of Corroboration and Overlap

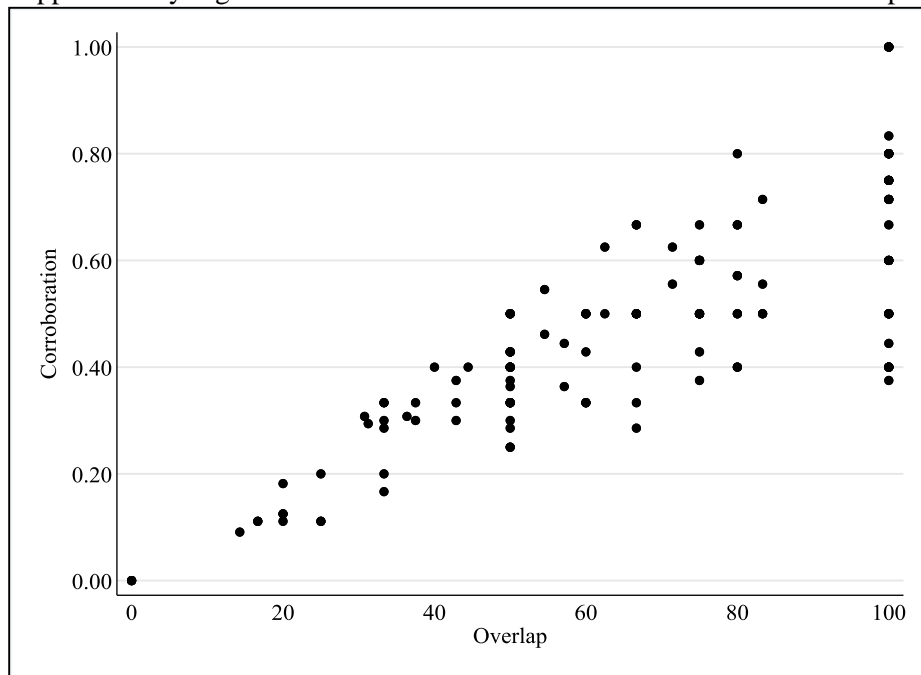

Supplement: NIHMS1626752-supplement-1.pdf [file NIHMS1626752-supplement-1.pdf]
